# Supplementary material for: MicroRNA-1291 Is Associated With Locoregional Metastases in Patients With Early-Stage Breast Cancer
Source: Front Genet. 2020 Dec 2;11:562114. doi: 10.3389/fgene.2020.562114 (PMC7738477; doi:10.3389/fgene.2020.562114)
Supplement: Supplementary file 6 [file Table_4.xlsx]

## Sheet: Sheet1
ID	Description	GeneRatio	BgRatio	pvalue	p.adjust	geneID	Count
R-HSA-9006934	Signaling by Receptor Tyrosine Kinases	23/97	473/10609	2.63e-11	2.12e-08	HNRNPA1, RAB4A, ITGA3, RALA, FGFR3, FGF9, MAPK3, AKT2, CBL, PGF, FLT3, COL4A2, ITGAV, IGF1R, PRKCA, RALGDS, TGFA, PRKCB, CRK, LAMB2, STAT5B, JUP, GRB2	23
R-HSA-4086400	PCP/CE pathway	11/97	92/10609	6.11e-10	1.73e-07	PSMF1, VANGL2, WNT11, FZD3, WNT1, RAC2, PRKCA, DVL3, WNT4, FZD5, PRKCB	11
R-HSA-3858494	Beta-catenin independent WNT signaling	13/97	146/10609	6.42e-10	1.73e-07	PSMF1, VANGL2, TCF7, WNT11, FZD3, WNT1, RAC2, TCF7L2, PRKCA, DVL3, WNT4, FZD5, PRKCB	13
R-HSA-195721	Signaling by WNT	17/97	328/10609	5.71e-09	1.15e-06	H4C8, PSMF1, VANGL2, TCF7, WNT11, AXIN1, FZD3, AKT2, WNT1, RAC2, TCF7L2, PRKCA, DVL3, WNT4, FZD5, PRKCB, AXIN2	17
R-HSA-5663202	Diseases of signal transduction	17/97	377/10609	4.50e-08	7.26e-06	PSMF1, FGFR3, FGF9, MAPK3, AXIN1, AKT2, CBL, RAC2, RAF1, CASP9, TCF7L2, TGFA, FZD5, SMAD3, PTEN, STAT5B, GRB2	17
R-HSA-109606	Intrinsic Pathway for Apoptosis	7/97	53/10609	4.69e-07	6.31e-05	E2F1, MAPK3, AKT2, CASP9, CDKN2A, BCL2L1, CYCS	7
R-HSA-2219528	PI3K/AKT Signaling in Cancer	8/97	101/10609	3.67e-06	3.76e-04	FGFR3, FGF9, AKT2, RAC2, CASP9, TGFA, PTEN, GRB2	8
R-HSA-449147	Signaling by Interleukins	16/97	460/10609	3.73e-06	3.76e-04	HMOX1, PSMF1, RALA, NOS2, MAPK9, MMP2, MAPK3, CBL, SMAD3, CRK, CXCL8, BCL2L1, STAT5B, GRB2, CSF2RA, TNF	16
R-HSA-76002	Platelet activation, signaling and aggregation	12/97	262/10609	4.42e-06	3.96e-04	GTPBP2, TGFB2, MAPK3, PIK3CG, TGFB3, RAC2, RAF1, PIK3R5, PRKCA, PRKCB, CRK, GRB2	12
R-HSA-5654732	Negative regulation of FGFR3 signaling	5/97	29/10609	5.75e-06	4.55e-04	FGFR3, FGF9, MAPK3, CBL, GRB2	5
R-HSA-199418	Negative regulation of the PI3K/AKT network	8/97	110/10609	6.95e-06	4.55e-04	FGFR3, FGF9, MAPK3, AKT2, RAC2, TGFA, PTEN, GRB2	8
R-HSA-2428928	IRS-related events triggered by IGF1R	6/97	52/10609	7.25e-06	4.55e-04	FGFR3, FGF9, AKT2, FLT3, IGF1R, GRB2	6
R-HSA-201681	TCF dependent signaling in response to WNT	11/97	230/10609	7.56e-06	4.55e-04	H4C8, PSMF1, TCF7, AXIN1, AKT2, WNT1, TCF7L2, DVL3, WNT4, FZD5, AXIN2	11
R-HSA-2428924	IGF1R signaling cascade	6/97	53/10609	8.11e-06	4.55e-04	FGFR3, FGF9, AKT2, FLT3, IGF1R, GRB2	6
R-HSA-2404192	Signaling by Type 1 Insulin-like Growth Factor 1 Receptor (IGF1R)	6/97	54/10609	9.06e-06	4.55e-04	FGFR3, FGF9, AKT2, FLT3, IGF1R, GRB2	6
R-HSA-74751	Insulin receptor signalling cascade	6/97	54/10609	9.06e-06	4.55e-04	FGFR3, FGF9, MAPK3, AKT2, FLT3, GRB2	6
R-HSA-2559583	Cellular Senescence	10/97	192/10609	9.57e-06	4.55e-04	H4C8, MINK1, MAPK9, E2F1, MAPK3, CCNE1, CDK6, ETS1, CDKN2A, CXCL8	10
R-HSA-2559585	Oncogene Induced Senescence	5/97	33/10609	1.12e-05	5.00e-04	E2F1, MAPK3, CDK6, ETS1, CDKN2A	5
R-HSA-187687	Signalling to ERKs	5/97	34/10609	1.30e-05	5.52e-04	RALA, MAPK3, RALGDS, CRK, GRB2	5
R-HSA-111471	Apoptotic factor-mediated response	4/97	18/10609	1.82e-05	7.35e-04	MAPK3, CASP9, CDKN2A, CYCS	4
R-HSA-9006925	Intracellular signaling by second messengers	12/97	304/10609	1.99e-05	7.46e-04	PSMF1, FGFR3, FGF9, MAPK3, AKT2, RAC2, CASP9, PML, PRKCA, TGFA, PTEN, GRB2	12
R-HSA-4086398	Ca2+ pathway	6/97	62/10609	2.03e-05	7.46e-04	TCF7, WNT11, FZD3, TCF7L2, PRKCA, FZD5	6
R-HSA-373080	Class B/2 (Secretin family receptors)	7/97	94/10609	2.30e-05	8.06e-04	WNT11, FZD3, FZD10, WNT1, SMO, WNT4, FZD5	7
R-HSA-9645135	STAT5 Activation	3/97	7/10609	2.53e-05	8.49e-04	FLT3, STAT5B, GRB2	3
R-HSA-1257604	PIP3 activates AKT signaling	11/97	263/10609	2.66e-05	8.59e-04	PSMF1, FGFR3, FGF9, MAPK3, AKT2, RAC2, CASP9, PML, TGFA, PTEN, GRB2	11
R-HSA-5654741	Signaling by FGFR3	5/97	40/10609	2.94e-05	9.13e-04	FGFR3, FGF9, MAPK3, CBL, GRB2	5
R-HSA-9607240	FLT3 Signaling	11/97	267/10609	3.06e-05	9.14e-04	PSMF1, FGFR3, FGF9, MAPK3, AKT2, FLT3, RAF1, TGFA, STAT5B, GRB2, CSF2RA	11
R-HSA-4411364	Binding of TCF/LEF:CTNNB1 to target gene promoters	3/97	8/10609	4.01e-05	1.16e-03	TCF7, TCF7L2, AXIN2	3
R-HSA-109704	PI3K Cascade	5/97	44/10609	4.72e-05	1.31e-03	FGFR3, FGF9, AKT2, FLT3, GRB2	5
R-HSA-194138	Signaling by VEGF	7/97	107/10609	5.31e-05	1.43e-03	AKT2, PGF, ITGAV, PRKCA, PRKCB, CRK, JUP	7
R-HSA-5668599	RHO GTPases Activate NADPH Oxidases	4/97	24/10609	6.06e-05	1.58e-03	MAPK3, RAC2, PRKCA, PRKCB	4
R-HSA-9006335	Signaling by Erythropoietin	4/97	25/10609	7.17e-05	1.71e-03	PIK3CG, PIK3R5, STAT5B, GRB2	4
R-HSA-112399	IRS-mediated signalling	5/97	48/10609	7.23e-05	1.71e-03	FGFR3, FGF9, AKT2, FLT3, GRB2	5
R-HSA-512988	Interleukin-3, Interleukin-5 and GM-CSF signaling	5/97	48/10609	7.23e-05	1.71e-03	CBL, CRK, STAT5B, GRB2, CSF2RA	5
R-HSA-74752	Signaling by Insulin receptor	6/97	78/10609	7.55e-05	1.74e-03	FGFR3, FGF9, MAPK3, AKT2, FLT3, GRB2	6
R-HSA-6806834	Signaling by MET	6/97	79/10609	8.12e-05	1.82e-03	RAB4A, ITGA3, CBL, CRK, LAMB2, GRB2	6
R-HSA-8875656	MET receptor recycling	3/97	10/10609	8.49e-05	1.85e-03	RAB4A, CRK, GRB2	3
R-HSA-111458	Formation of apoptosome	3/97	11/10609	1.16e-04	2.40e-03	MAPK3, CASP9, CYCS	3
R-HSA-9627069	Regulation of the apoptosome activity	3/97	11/10609	1.16e-04	2.40e-03	MAPK3, CASP9, CYCS	3
R-HSA-2559580	Oxidative Stress Induced Senescence	7/97	122/10609	1.22e-04	2.46e-03	H4C8, MINK1, MAPK9, E2F1, MAPK3, CDK6, CDKN2A	7
R-HSA-190236	Signaling by FGFR	6/97	87/10609	1.39e-04	2.74e-03	HNRNPA1, FGFR3, FGF9, MAPK3, CBL, GRB2	6
R-HSA-9616222	Transcriptional regulation of granulopoiesis	6/97	88/10609	1.48e-04	2.81e-03	H4C8, E2F1, RARA, PML, RXRA, CEBPA	6
R-HSA-3000157	Laminin interactions	4/97	30/10609	1.50e-04	2.81e-03	ITGA3, COL4A2, ITGAV, LAMB2	4
R-HSA-4641262	Disassembly of the destruction complex and recruitment of AXIN to the membrane	4/97	31/10609	1.71e-04	3.07e-03	AXIN1, WNT1, DVL3, FZD5	4
R-HSA-5654733	Negative regulation of FGFR4 signaling	4/97	31/10609	1.71e-04	3.07e-03	FGF9, MAPK3, CBL, GRB2	4
R-HSA-111461	Cytochrome c-mediated apoptotic response	3/97	13/10609	1.98e-04	3.48e-03	MAPK3, CASP9, CYCS	3
R-HSA-109581	Apoptosis	8/97	177/10609	2.09e-04	3.59e-03	PSMF1, E2F1, MAPK3, AKT2, CASP9, CDKN2A, BCL2L1, CYCS	8
R-HSA-5654726	Negative regulation of FGFR1 signaling	4/97	33/10609	2.19e-04	3.62e-03	FGF9, MAPK3, CBL, GRB2	4
R-HSA-5357801	Programmed Cell Death	8/97	180/10609	2.35e-04	3.62e-03	PSMF1, E2F1, MAPK3, AKT2, CASP9, CDKN2A, BCL2L1, CYCS	8
R-HSA-9630747	Diseases of Cellular Senescence	2/97	3/10609	2.47e-04	3.62e-03	CDK6, CDKN2A	2
R-HSA-9630750	Evasion of Oncogene Induced Senescence Due to p16INK4A Defects	2/97	3/10609	2.47e-04	3.62e-03	CDK6, CDKN2A	2
R-HSA-9630794	Evasion of Oncogene Induced Senescence Due to Defective p16INK4A binding to CDK4 and CDK6	2/97	3/10609	2.47e-04	3.62e-03	CDK6, CDKN2A	2
R-HSA-9632693	Evasion of Oxidative Stress Induced Senescence Due to p16INK4A Defects	2/97	3/10609	2.47e-04	3.62e-03	CDK6, CDKN2A	2
R-HSA-9632700	Evasion of Oxidative Stress Induced Senescence Due to Defective p16INK4A binding to CDK4 and CDK6	2/97	3/10609	2.47e-04	3.62e-03	CDK6, CDKN2A	2
R-HSA-5654727	Negative regulation of FGFR2 signaling	4/97	34/10609	2.47e-04	3.62e-03	FGF9, MAPK3, CBL, GRB2	4
R-HSA-4420097	VEGFA-VEGFR2 Pathway	6/97	99/10609	2.83e-04	4.07e-03	AKT2, ITGAV, PRKCA, PRKCB, CRK, JUP	6
R-HSA-6811558	PI5P, PP2A and IER3 Regulate PI3K/AKT Signaling	6/97	103/10609	3.50e-04	4.96e-03	FGFR3, FGF9, MAPK3, RAC2, TGFA, GRB2	6
R-HSA-9006931	Signaling by Nuclear Receptors	10/97	297/10609	3.72e-04	5.04e-03	H4C8, MMP2, MAPK3, AXIN1, AKT2, PPARD, RARA, IGF1R, TGFA, RXRA	10
R-HSA-2262752	Cellular responses to stress	13/97	476/10609	3.75e-04	5.04e-03	H4C8, LIMD1, PSMF1, MINK1, MAPK9, E2F1, MAPK3, CCNE1, CDK6, ETS1, CDKN2A, CXCL8, CYCS	13
R-HSA-1295596	Spry regulation of FGF signaling	3/97	16/10609	3.81e-04	5.04e-03	MAPK3, CBL, GRB2	3
R-HSA-1433559	Regulation of KIT signaling	3/97	16/10609	3.81e-04	5.04e-03	CBL, PRKCA, GRB2	3
R-HSA-453279	Mitotic G1-G1/S phases	7/97	149/10609	4.19e-04	5.45e-03	PSMF1, E2F1, CCNE1, AKT2, CDK6, MAX, CDKN2A	7
R-HSA-5673001	RAF/MAP kinase cascade	9/97	249/10609	4.43e-04	5.67e-03	PSMF1, FGFR3, FGF9, MAPK3, FLT3, RAF1, TGFA, GRB2, CSF2RA	9
R-HSA-6785807	Interleukin-4 and Interleukin-13 signaling	6/97	108/10609	4.52e-04	5.70e-03	HMOX1, NOS2, MMP2, CXCL8, BCL2L1, TNF	6
R-HSA-8953897	Cellular responses to external stimuli	13/97	490/10609	4.95e-04	6.13e-03	H4C8, LIMD1, PSMF1, MINK1, MAPK9, E2F1, MAPK3, CCNE1, CDK6, ETS1, CDKN2A, CXCL8, CYCS	13
R-HSA-5654743	Signaling by FGFR4	4/97	41/10609	5.13e-04	6.13e-03	FGF9, MAPK3, CBL, GRB2	4
R-HSA-8875878	MET promotes cell motility	4/97	41/10609	5.13e-04	6.13e-03	ITGA3, CRK, LAMB2, GRB2	4
R-HSA-5684996	MAPK1/MAPK3 signaling	9/97	255/10609	5.26e-04	6.13e-03	PSMF1, FGFR3, FGF9, MAPK3, FLT3, RAF1, TGFA, GRB2, CSF2RA	9
R-HSA-5654738	Signaling by FGFR2	5/97	73/10609	5.29e-04	6.13e-03	HNRNPA1, FGF9, MAPK3, CBL, GRB2	5
R-HSA-5654704	SHC-mediated cascade:FGFR3	3/97	18/10609	5.47e-04	6.13e-03	FGFR3, FGF9, GRB2	3
R-HSA-5654710	PI-3K cascade:FGFR3	3/97	18/10609	5.47e-04	6.13e-03	FGFR3, FGF9, GRB2	3
R-HSA-881907	Gastrin-CREB signalling pathway via PKC and MAPK	3/97	18/10609	5.47e-04	6.13e-03	MAPK3, PRKCA, GRB2	3
R-HSA-2219530	Constitutive Signaling by Aberrant PI3K in Cancer	5/97	75/10609	6.00e-04	6.63e-03	FGFR3, FGF9, RAC2, TGFA, GRB2	5
R-HSA-1433557	Signaling by SCF-KIT	4/97	43/10609	6.17e-04	6.73e-03	CBL, PRKCA, STAT5B, GRB2	4
R-HSA-3000178	ECM proteoglycans	5/97	76/10609	6.37e-04	6.86e-03	TGFB2, TGFB3, COL4A2, ITGAV, LAMB2	5
R-HSA-9009391	Extra-nuclear estrogen signaling	5/97	77/10609	6.77e-04	7.18e-03	MMP2, MAPK3, AKT2, IGF1R, TGFA	5
R-HSA-167044	Signalling to RAS	3/97	20/10609	7.55e-04	7.81e-03	RALA, RALGDS, GRB2	3
R-HSA-5654706	FRS-mediated FGFR3 signaling	3/97	20/10609	7.55e-04	7.81e-03	FGFR3, FGF9, GRB2	3
R-HSA-187037	Signaling by NTRK1 (TRKA)	5/97	80/10609	8.06e-04	8.20e-03	RALA, MAPK3, RALGDS, CRK, GRB2	5
R-HSA-114516	Disinhibition of SNARE formation	2/97	5/10609	8.13e-04	8.20e-03	PRKCA, PRKCB	2
R-HSA-69202	Cyclin E associated events during G1/S transition	5/97	83/10609	9.52e-04	9.49e-03	PSMF1, E2F1, CCNE1, AKT2, MAX	5
R-HSA-5655332	Signaling by FGFR3 in disease	3/97	22/10609	1.01e-03	9.66e-03	FGFR3, FGF9, GRB2	3
R-HSA-8853338	Signaling by FGFR3 point mutants in cancer	3/97	22/10609	1.01e-03	9.66e-03	FGFR3, FGF9, GRB2	3
R-HSA-912631	Regulation of signaling by CBL	3/97	22/10609	1.01e-03	9.66e-03	CBL, CRK, GRB2	3
R-HSA-69656	Cyclin A:Cdk2-associated events at S phase entry	5/97	85/10609	1.06e-03	1.01e-02	PSMF1, E2F1, CCNE1, AKT2, MAX	5
R-HSA-5654736	Signaling by FGFR1	4/97	50/10609	1.10e-03	1.03e-02	FGF9, MAPK3, CBL, GRB2	4
R-HSA-111459	Activation of caspases through apoptosome-mediated cleavage	2/97	6/10609	1.21e-03	1.11e-02	CASP9, CYCS	2
R-HSA-5674499	Negative feedback regulation of MAPK pathway	2/97	6/10609	1.21e-03	1.11e-02	MAPK3, RAF1	2
R-HSA-1660499	Synthesis of PIPs at the plasma membrane	4/97	52/10609	1.27e-03	1.15e-02	RAB4A, PIK3CG, PIK3R5, PTEN	4
R-HSA-9634638	Estrogen-dependent nuclear events downstream of ESR-membrane signaling	3/97	24/10609	1.30e-03	1.17e-02	MAPK3, AKT2, TGFA	3
R-HSA-5683057	MAPK family signaling cascades	9/97	294/10609	1.44e-03	1.26e-02	PSMF1, FGFR3, FGF9, MAPK3, FLT3, RAF1, TGFA, GRB2, CSF2RA	9
R-HSA-1643713	Signaling by EGFR in Cancer	3/97	25/10609	1.47e-03	1.26e-02	CBL, TGFA, GRB2	3
R-HSA-392451	G beta:gamma signalling through PI3Kgamma	3/97	25/10609	1.47e-03	1.26e-02	AKT2, PIK3CG, PIK3R5	3
R-HSA-5654708	Downstream signaling of activated FGFR3	3/97	25/10609	1.47e-03	1.26e-02	FGFR3, FGF9, GRB2	3
R-HSA-3238698	WNT ligand biogenesis and trafficking	3/97	26/10609	1.65e-03	1.38e-02	WNT11, WNT1, WNT4	3
R-HSA-111463	SMAC (DIABLO) binds to IAPs	2/97	7/10609	1.69e-03	1.38e-02	CASP9, CYCS	2
R-HSA-111464	SMAC(DIABLO)-mediated dissociation of IAP:caspase complexes	2/97	7/10609	1.69e-03	1.38e-02	CASP9, CYCS	2
R-HSA-190371	FGFR3b ligand binding and activation	2/97	7/10609	1.69e-03	1.38e-02	FGFR3, FGF9	2
R-HSA-1474244	Extracellular matrix organization	9/97	301/10609	1.70e-03	1.38e-02	CAPNS1, ITGA3, MMP2, TGFB2, TGFB3, COL4A2, ITGAV, PRKCA, LAMB2	9
R-HSA-8878159	Transcriptional regulation by RUNX3	5/97	96/10609	1.83e-03	1.47e-02	PSMF1, TCF7, CDKN2A, TCF7L2, SMAD3	5
R-HSA-1538133	G0 and Early G1	3/97	27/10609	1.85e-03	1.48e-02	E2F1, CCNE1, MAX	3
R-HSA-186797	Signaling by PDGF	4/97	58/10609	1.91e-03	1.51e-02	COL4A2, CRK, STAT5B, GRB2	4
R-HSA-3000171	Non-integrin membrane-ECM interactions	4/97	59/10609	2.03e-03	1.59e-02	COL4A2, ITGAV, PRKCA, LAMB2	4
R-HSA-111469	SMAC, XIAP-regulated apoptotic response	2/97	8/10609	2.24e-03	1.72e-02	CASP9, CYCS	2
R-HSA-8951430	RUNX3 regulates WNT signaling	2/97	8/10609	2.24e-03	1.72e-02	TCF7, TCF7L2	2
R-HSA-186763	Downstream signal transduction	3/97	29/10609	2.28e-03	1.72e-02	CRK, STAT5B, GRB2	3
R-HSA-166520	Signaling by NTRKs	5/97	101/10609	2.28e-03	1.72e-02	RALA, MAPK3, RALGDS, CRK, GRB2	5
R-HSA-4090294	SUMOylation of intracellular receptors	3/97	30/10609	2.52e-03	1.88e-02	RARA, PIAS3, RXRA	3
R-HSA-1226099	Signaling by FGFR in disease	4/97	63/10609	2.59e-03	1.92e-02	FGFR3, FGF9, STAT5B, GRB2	4
R-HSA-4608870	Asymmetric localization of PCP proteins	4/97	64/10609	2.74e-03	1.99e-02	PSMF1, VANGL2, FZD3, FZD5	4
R-HSA-182971	EGFR downregulation	3/97	31/10609	2.77e-03	1.99e-02	CBL, TGFA, GRB2	3
R-HSA-1839124	FGFR1 mutant receptor activation	3/97	31/10609	2.77e-03	1.99e-02	FGF9, STAT5B, GRB2	3
R-HSA-2179392	EGFR Transactivation by Gastrin	2/97	9/10609	2.86e-03	2.00e-02	PRKCA, GRB2	2
R-HSA-2428933	SHC-related events triggered by IGF1R	2/97	9/10609	2.86e-03	2.00e-02	IGF1R, GRB2	2
R-HSA-8948747	Regulation of PTEN localization	2/97	9/10609	2.86e-03	2.00e-02	PML, PTEN	2
R-HSA-2871796	FCERI mediated MAPK activation	3/97	32/10609	3.03e-03	2.09e-02	MAPK9, MAPK3, GRB2	3
R-HSA-397795	G-protein beta:gamma signalling	3/97	32/10609	3.03e-03	2.09e-02	AKT2, PIK3CG, PIK3R5	3
R-HSA-2559582	Senescence-Associated Secretory Phenotype (SASP)	5/97	108/10609	3.06e-03	2.09e-02	H4C8, MAPK3, CDK6, CDKN2A, CXCL8	5
R-HSA-450341	Activation of the AP-1 family of transcription factors	2/97	10/10609	3.55e-03	2.37e-02	MAPK9, MAPK3	2
R-HSA-74749	Signal attenuation	2/97	10/10609	3.55e-03	2.37e-02	MAPK3, GRB2	2
R-HSA-8853334	Signaling by FGFR3 fusions in cancer	2/97	10/10609	3.55e-03	2.37e-02	FGFR3, GRB2	2
R-HSA-4791275	Signaling by WNT in cancer	3/97	34/10609	3.61e-03	2.39e-02	AXIN1, TCF7L2, FZD5	3
R-HSA-114604	GPVI-mediated activation cascade	3/97	35/10609	3.92e-03	2.57e-02	PIK3CG, RAC2, PIK3R5	3
R-HSA-8939211	ESR-mediated signaling	7/97	221/10609	4.07e-03	2.65e-02	H4C8, MMP2, MAPK3, AXIN1, AKT2, IGF1R, TGFA	7
R-HSA-8875555	MET activates RAP1 and RAC1	2/97	11/10609	4.31e-03	2.78e-02	CRK, GRB2	2
R-HSA-2129379	Molecules associated with elastic fibres	3/97	38/10609	4.96e-03	3.15e-02	TGFB2, TGFB3, ITGAV	3
R-HSA-5655302	Signaling by FGFR1 in disease	3/97	38/10609	4.96e-03	3.15e-02	FGF9, STAT5B, GRB2	3
R-HSA-1839130	Signaling by activated point mutants of FGFR3	2/97	12/10609	5.14e-03	3.17e-02	FGFR3, FGF9	2
R-HSA-2033514	FGFR3 mutant receptor activation	2/97	12/10609	5.14e-03	3.17e-02	FGFR3, FGF9	2
R-HSA-4641265	Repression of WNT target genes	2/97	12/10609	5.14e-03	3.17e-02	TCF7, TCF7L2	2
R-HSA-9027276	Erythropoietin activates Phosphoinositide-3-kinase (PI3K)	2/97	12/10609	5.14e-03	3.17e-02	PIK3CG, PIK3R5	2
R-HSA-171007	p38MAPK events	2/97	13/10609	6.04e-03	3.59e-02	RALA, RALGDS	2
R-HSA-179812	GRB2 events in EGFR signaling	2/97	13/10609	6.04e-03	3.59e-02	TGFA, GRB2	2
R-HSA-190239	FGFR3 ligand binding and activation	2/97	13/10609	6.04e-03	3.59e-02	FGFR3, FGF9	2
R-HSA-190372	FGFR3c ligand binding and activation	2/97	13/10609	6.04e-03	3.59e-02	FGFR3, FGF9	2
R-HSA-5654227	Phospholipase C-mediated cascade; FGFR3	2/97	13/10609	6.04e-03	3.59e-02	FGFR3, FGF9	2
R-HSA-3700989	Transcriptional Regulation by TP53	9/97	365/10609	6.09e-03	3.59e-02	SCO1, E2F1, CCNE1, AKT2, PML, CDKN2A, BTG2, PTEN, CYCS	9
R-HSA-3108232	SUMO E3 ligases SUMOylate target proteins	6/97	181/10609	6.23e-03	3.64e-02	H4C8, RARA, PIAS3, PML, CDKN2A, RXRA	6
R-HSA-3769402	Deactivation of the beta-catenin transactivating complex	3/97	42/10609	6.57e-03	3.80e-02	TCF7, AKT2, TCF7L2	3
R-HSA-195253	Degradation of beta-catenin by the destruction complex	4/97	82/10609	6.67e-03	3.80e-02	PSMF1, TCF7, AXIN1, TCF7L2	4
R-HSA-69206	G1/S Transition	5/97	131/10609	6.93e-03	3.80e-02	PSMF1, E2F1, CCNE1, AKT2, MAX	5
R-HSA-1483255	PI Metabolism	4/97	83/10609	6.96e-03	3.80e-02	RAB4A, PIK3CG, PIK3R5, PTEN	4
R-HSA-169893	Prolonged ERK activation events	2/97	14/10609	7.01e-03	3.80e-02	MAPK3, CRK	2
R-HSA-180336	SHC1 events in EGFR signaling	2/97	14/10609	7.01e-03	3.80e-02	TGFA, GRB2	2
R-HSA-198323	AKT phosphorylates targets in the cytosol	2/97	14/10609	7.01e-03	3.80e-02	AKT2, CASP9	2
R-HSA-200425	Import of palmitoyl-CoA into the mitochondrial matrix	2/97	14/10609	7.01e-03	3.80e-02	PPARD, RXRA	2
R-HSA-6804116	TP53 Regulates Transcription of Genes Involved in G1 Cell Cycle Arrest	2/97	14/10609	7.01e-03	3.80e-02	E2F1, CCNE1	2
R-HSA-8983432	Interleukin-15 signaling	2/97	14/10609	7.01e-03	3.80e-02	STAT5B, GRB2	2
R-HSA-5362517	Signaling by Retinoic Acid	3/97	43/10609	7.02e-03	3.80e-02	PPARD, RARA, RXRA	3
R-HSA-381340	Transcriptional regulation of white adipocyte differentiation	4/97	84/10609	7.25e-03	3.89e-02	WNT1, RXRA, TNF, CEBPA	4
R-HSA-2990846	SUMOylation	6/97	187/10609	7.27e-03	3.89e-02	H4C8, RARA, PIAS3, PML, CDKN2A, RXRA	6
R-HSA-451927	Interleukin-2 family signaling	3/97	44/10609	7.48e-03	3.92e-02	STAT5B, GRB2, CSF2RA	3
R-HSA-69231	Cyclin D associated events in G1	3/97	44/10609	7.48e-03	3.92e-02	E2F1, CDK6, CDKN2A	3
R-HSA-69236	G1 Phase	3/97	44/10609	7.48e-03	3.92e-02	E2F1, CDK6, CDKN2A	3
R-HSA-5632684	Hedgehog 'on' state	4/97	85/10609	7.56e-03	3.94e-02	PSMF1, GLI2, SUFU, SMO	4
R-HSA-76005	Response to elevated platelet cytosolic Ca2+	5/97	134/10609	7.61e-03	3.94e-02	GTPBP2, TGFB2, TGFB3, PRKCA, PRKCB	5
R-HSA-5628897	TP53 Regulates Metabolic Genes	4/97	86/10609	7.87e-03	3.98e-02	SCO1, AKT2, PTEN, CYCS	4
R-HSA-1566948	Elastic fibre formation	3/97	45/10609	7.96e-03	3.98e-02	TGFB2, TGFB3, ITGAV	3
R-HSA-4419969	Depolymerisation of the Nuclear Lamina	2/97	15/10609	8.04e-03	3.98e-02	PRKCA, PRKCB	2
R-HSA-5099900	WNT5A-dependent internalization of FZD4	2/97	15/10609	8.04e-03	3.98e-02	PRKCA, PRKCB	2
R-HSA-5637810	Constitutive Signaling by EGFRvIII	2/97	15/10609	8.04e-03	3.98e-02	CBL, GRB2	2
R-HSA-5637812	Signaling by EGFRvIII in Cancer	2/97	15/10609	8.04e-03	3.98e-02	CBL, GRB2	2
R-HSA-8875360	InlB-mediated entry of Listeria monocytogenes into host cell	2/97	15/10609	8.04e-03	3.98e-02	CBL, GRB2	2
R-HSA-6807070	PTEN Regulation	5/97	139/10609	8.84e-03	4.34e-02	PSMF1, MAPK3, AKT2, PML, PTEN	5
R-HSA-201722	Formation of the beta-catenin:TCF transactivating complex	4/97	89/10609	8.87e-03	4.34e-02	H4C8, TCF7, TCF7L2, AXIN2	4
R-HSA-204174	Regulation of pyruvate dehydrogenase (PDH) complex	2/97	16/10609	9.13e-03	4.44e-02	PPARD, RXRA	2
R-HSA-177929	Signaling by EGFR	3/97	49/10609	1.01e-02	4.84e-02	CBL, TGFA, GRB2	3
R-HSA-6791312	TP53 Regulates Transcription of Cell Cycle Genes	3/97	49/10609	1.01e-02	4.84e-02	E2F1, CCNE1, BTG2	3
R-HSA-180292	GAB1 signalosome	2/97	17/10609	1.03e-02	4.86e-02	TGFA, GRB2	2
R-HSA-416993	Trafficking of GluR2-containing AMPA receptors	2/97	17/10609	1.03e-02	4.86e-02	PRKCA, PRKCB	2
R-HSA-8934593	Regulation of RUNX1 Expression and Activity	2/97	17/10609	1.03e-02	4.86e-02	CDK6, PML	2
R-HSA-1227986	Signaling by ERBB2	3/97	50/10609	1.06e-02	5.00e-02	AKT2, PRKCA, GRB2	3
R-HSA-1839117	Signaling by cytosolic FGFR1 fusion mutants	2/97	18/10609	1.15e-02	5.37e-02	STAT5B, GRB2	2
R-HSA-383280	Nuclear Receptor transcription pathway	3/97	52/10609	1.18e-02	5.49e-02	PPARD, RARA, RXRA	3
R-HSA-1236382	Constitutive Signaling by Ligand-Responsive EGFR Cancer Variants	2/97	19/10609	1.28e-02	5.83e-02	CBL, GRB2	2
R-HSA-1362277	Transcription of E2F targets under negative control by DREAM complex	2/97	19/10609	1.28e-02	5.83e-02	E2F1, MAX	2
R-HSA-5637815	Signaling by Ligand-Responsive EGFR Variants in Cancer	2/97	19/10609	1.28e-02	5.83e-02	CBL, GRB2	2
R-HSA-8848021	Signaling by PTK6	3/97	54/10609	1.31e-02	5.92e-02	CCNE1, CBL, CRK	3
R-HSA-9006927	Signaling by Non-Receptor Tyrosine Kinases	3/97	54/10609	1.31e-02	5.92e-02	CCNE1, CBL, CRK	3
R-HSA-5689880	Ub-specific processing proteases	6/97	213/10609	1.33e-02	5.96e-02	H2AC11, PSMF1, AXIN1, SMAD3, AXIN2, PTEN	6
R-HSA-4641257	Degradation of AXIN	3/97	55/10609	1.38e-02	6.15e-02	PSMF1, AXIN1, AXIN2	3
R-HSA-3232118	SUMOylation of transcription factors	2/97	20/10609	1.41e-02	6.16e-02	PIAS3, CDKN2A	2
R-HSA-5654719	SHC-mediated cascade:FGFR4	2/97	20/10609	1.41e-02	6.16e-02	FGF9, GRB2	2
R-HSA-5654720	PI-3K cascade:FGFR4	2/97	20/10609	1.41e-02	6.16e-02	FGF9, GRB2	2
R-HSA-8876384	Listeria monocytogenes entry into host cells	2/97	20/10609	1.41e-02	6.16e-02	CBL, GRB2	2
R-HSA-445144	Signal transduction by L1	2/97	21/10609	1.55e-02	6.59e-02	MAPK3, ITGAV	2
R-HSA-5218921	VEGFR2 mediated cell proliferation	2/97	21/10609	1.55e-02	6.59e-02	PRKCA, PRKCB	2
R-HSA-5654688	SHC-mediated cascade:FGFR1	2/97	21/10609	1.55e-02	6.59e-02	FGF9, GRB2	2
R-HSA-5654689	PI-3K cascade:FGFR1	2/97	21/10609	1.55e-02	6.59e-02	FGF9, GRB2	2
R-HSA-6807004	Negative regulation of MET activity	2/97	21/10609	1.55e-02	6.59e-02	CBL, GRB2	2
R-HSA-69242	S Phase	5/97	161/10609	1.59e-02	6.73e-02	PSMF1, E2F1, CCNE1, AKT2, MAX	5
R-HSA-5688426	Deubiquitination	7/97	290/10609	1.68e-02	7.06e-02	H2AC11, PSMF1, AXIN1, TRAF3, SMAD3, AXIN2, PTEN	7
R-HSA-1250196	SHC1 events in ERBB2 signaling	2/97	22/10609	1.70e-02	7.06e-02	PRKCA, GRB2	2
R-HSA-5654712	FRS-mediated FGFR4 signaling	2/97	22/10609	1.70e-02	7.06e-02	FGF9, GRB2	2
R-HSA-5610783	Degradation of GLI2 by the proteasome	3/97	60/10609	1.74e-02	7.21e-02	PSMF1, GLI2, SUFU	3
R-HSA-2029482	Regulation of actin dynamics for phagocytic cup formation	3/97	61/10609	1.82e-02	7.49e-02	MAPK3, CRK, GRB2	3
R-HSA-5654693	FRS-mediated FGFR1 signaling	2/97	23/10609	1.85e-02	7.49e-02	FGF9, GRB2	2
R-HSA-5654695	PI-3K cascade:FGFR2	2/97	23/10609	1.85e-02	7.49e-02	FGF9, GRB2	2
R-HSA-5654699	SHC-mediated cascade:FGFR2	2/97	23/10609	1.85e-02	7.49e-02	FGF9, GRB2	2
R-HSA-375165	NCAM signaling for neurite out-growth	3/97	63/10609	1.98e-02	7.96e-02	MAPK3, COL4A2, GRB2	3
R-HSA-5610787	Hedgehog 'off' state	4/97	113/10609	1.98e-02	7.96e-02	PSMF1, GLI2, SUFU, SMO	4
R-HSA-982772	Growth hormone receptor signaling	2/97	24/10609	2.00e-02	8.00e-02	MAPK3, STAT5B	2
R-HSA-8878171	Transcriptional regulation by RUNX1	6/97	236/10609	2.10e-02	8.33e-02	H4C8, PSMF1, AXIN1, CDK6, PML, PRKCB	6
R-HSA-1428517	The citric acid (TCA) cycle and respiratory electron transport	5/97	174/10609	2.15e-02	8.48e-02	NDUFV3, SCO1, PPARD, CYCS, RXRA	5
R-HSA-5654700	FRS-mediated FGFR2 signaling	2/97	25/10609	2.17e-02	8.48e-02	FGF9, GRB2	2
R-HSA-5674400	Constitutive Signaling by AKT1 E17K in Cancer	2/97	25/10609	2.17e-02	8.48e-02	AKT2, CASP9	2
R-HSA-69563	p53-Dependent G1 DNA Damage Response	3/97	66/10609	2.24e-02	8.69e-02	PSMF1, CCNE1, CDKN2A	3
R-HSA-69580	p53-Dependent G1/S DNA damage checkpoint	3/97	66/10609	2.24e-02	8.69e-02	PSMF1, CCNE1, CDKN2A	3
R-HSA-8878166	Transcriptional regulation by RUNX2	4/97	120/10609	2.41e-02	9.30e-02	PSMF1, GLI2, MAPK3, AKT2	4
R-HSA-69615	G1/S DNA Damage Checkpoints	3/97	68/10609	2.42e-02	9.30e-02	PSMF1, CCNE1, CDKN2A	3
R-HSA-211976	Endogenous sterols	2/97	27/10609	2.50e-02	9.35e-02	ARNT2, RXRA	2
R-HSA-3000170	Syndecan interactions	2/97	27/10609	2.50e-02	9.35e-02	ITGAV, PRKCA	2
R-HSA-354192	Integrin alphaIIb beta3 signaling	2/97	27/10609	2.50e-02	9.35e-02	CRK, GRB2	2
R-HSA-5654716	Downstream signaling of activated FGFR4	2/97	27/10609	2.50e-02	9.35e-02	FGF9, GRB2	2
R-HSA-9006921	Integrin signaling	2/97	27/10609	2.50e-02	9.35e-02	CRK, GRB2	2
R-HSA-912526	Interleukin receptor SHC signaling	2/97	27/10609	2.50e-02	9.35e-02	GRB2, CSF2RA	2
R-HSA-8948751	Regulation of PTEN stability and activity	3/97	69/10609	2.51e-02	9.35e-02	PSMF1, AKT2, PTEN	3
R-HSA-69205	G1/S-Specific Transcription	2/97	28/10609	2.68e-02	9.62e-02	E2F1, CCNE1	2
R-HSA-1299308	Tandem of pore domain in a weak inwardly rectifying K+ channels (TWIK)	1/97	3/10609	2.72e-02	9.62e-02	KCNK6	1
R-HSA-165181	Inhibition of TSC complex formation by PKB	1/97	3/10609	2.72e-02	9.62e-02	AKT2	1
R-HSA-3304347	Loss of Function of SMAD4 in Cancer	1/97	3/10609	2.72e-02	9.62e-02	SMAD3	1
R-HSA-3311021	SMAD4 MH2 Domain Mutants in Cancer	1/97	3/10609	2.72e-02	9.62e-02	SMAD3	1
R-HSA-3315487	SMAD2/3 MH2 Domain Mutants in Cancer	1/97	3/10609	2.72e-02	9.62e-02	SMAD3	1
R-HSA-5339700	TCF7L2 mutants don't bind CTBP	1/97	3/10609	2.72e-02	9.62e-02	TCF7L2	1
R-HSA-5602571	TRAF3 deficiency - HSE	1/97	3/10609	2.72e-02	9.62e-02	TRAF3	1
R-HSA-5635851	GLI proteins bind promoters of Hh responsive genes to promote transcription	1/97	3/10609	2.72e-02	9.62e-02	GLI2	1
R-HSA-5653890	Lactose synthesis	1/97	3/10609	2.72e-02	9.62e-02	SLC2A1	1
R-HSA-844455	The NLRP1 inflammasome	1/97	3/10609	2.72e-02	9.62e-02	BCL2L1	1
R-HSA-1445148	Translocation of SLC2A4 (GLUT4) to the plasma membrane	3/97	72/10609	2.81e-02	9.89e-02	RAB4A, RALA, AKT2	3
R-HSA-195258	RHO GTPase Effectors	7/97	323/10609	2.83e-02	9.94e-02	H4C8, MAPK3, RAC2, PRKCA, DVL3, PRKCB, GRB2	7
R-HSA-5218920	VEGFR2 mediated vascular permeability	2/97	29/10609	2.86e-02	1.00e-01	AKT2, JUP	2
R-HSA-114452	Activation of BH3-only proteins	2/97	30/10609	3.05e-02	1.04e-01	E2F1, AKT2	2
R-HSA-5357956	TNFR1-induced NFkappaB signaling pathway	2/97	30/10609	3.05e-02	1.04e-01	TRAF1, TNF	2
R-HSA-5654696	Downstream signaling of activated FGFR2	2/97	30/10609	3.05e-02	1.04e-01	FGF9, GRB2	2
R-HSA-6804758	Regulation of TP53 Activity through Acetylation	2/97	30/10609	3.05e-02	1.04e-01	AKT2, PML	2
R-HSA-8874081	MET activates PTK2 signaling	2/97	30/10609	3.05e-02	1.04e-01	ITGA3, LAMB2	2
R-HSA-399719	Trafficking of AMPA receptors	2/97	31/10609	3.24e-02	1.08e-01	PRKCA, PRKCB	2
R-HSA-399721	Glutamate binding, activation of AMPA receptors and synaptic plasticity	2/97	31/10609	3.24e-02	1.08e-01	PRKCA, PRKCB	2
R-HSA-450282	MAPK targets/ Nuclear events mediated by MAP kinases	2/97	31/10609	3.24e-02	1.08e-01	MAPK9, MAPK3	2
R-HSA-5654687	Downstream signaling of activated FGFR1	2/97	31/10609	3.24e-02	1.08e-01	FGF9, GRB2	2
R-HSA-70268	Pyruvate metabolism	2/97	31/10609	3.24e-02	1.08e-01	PPARD, RXRA	2
R-HSA-8941326	RUNX2 regulates bone development	2/97	31/10609	3.24e-02	1.08e-01	GLI2, MAPK3	2
R-HSA-2454202	Fc epsilon receptor (FCERI) signaling	4/97	133/10609	3.35e-02	1.11e-01	PSMF1, MAPK9, MAPK3, GRB2	4
R-HSA-2173789	TGF-beta receptor signaling activates SMADs	2/97	32/10609	3.44e-02	1.14e-01	CBL, SMAD3	2
R-HSA-165158	Activation of AKT2	1/97	4/10609	3.61e-02	1.17e-01	AKT2	1
R-HSA-211163	AKT-mediated inactivation of FOXO1A	1/97	4/10609	3.61e-02	1.17e-01	AKT2	1
R-HSA-5368598	Negative regulation of TCF-dependent signaling by DVL-interacting proteins	1/97	4/10609	3.61e-02	1.17e-01	DVL3	1
R-HSA-69200	Phosphorylation of proteins involved in G1/S transition by active Cyclin E:Cdk2 complexes	1/97	4/10609	3.61e-02	1.17e-01	CCNE1	1
R-HSA-389356	CD28 co-stimulation	2/97	33/10609	3.64e-02	1.17e-01	AKT2, GRB2	2
R-HSA-5357905	Regulation of TNFR1 signaling	2/97	33/10609	3.64e-02	1.17e-01	TRAF1, TNF	2
R-HSA-8953750	Transcriptional Regulation by E2F6	2/97	34/10609	3.84e-02	1.23e-01	E2F1, MAX	2
R-HSA-68875	Mitotic Prophase	4/97	140/10609	3.93e-02	1.26e-01	H4C8, MAPK3, PRKCA, PRKCB	4
R-HSA-112314	Neurotransmitter receptors and postsynaptic signal transmission	5/97	206/10609	4.03e-02	1.29e-01	CHRNB2, PPM1F, MAPK3, PRKCA, PRKCB	5
R-HSA-1222556	ROS and RNS production in phagocytes	2/97	36/10609	4.26e-02	1.34e-01	NOS2, RAC2	2
R-HSA-5663213	RHO GTPases Activate WASPs and WAVEs	2/97	36/10609	4.26e-02	1.34e-01	MAPK3, GRB2	2
R-HSA-6802948	Signaling by high-kinase activity BRAF mutants	2/97	36/10609	4.26e-02	1.34e-01	MAPK3, RAF1	2
R-HSA-6804757	Regulation of TP53 Degradation	2/97	36/10609	4.26e-02	1.34e-01	AKT2, CDKN2A	2
R-HSA-216083	Integrin cell surface interactions	3/97	85/10609	4.27e-02	1.34e-01	ITGA3, COL4A2, ITGAV	3
R-HSA-2029480	Fcgamma receptor (FCGR) dependent phagocytosis	3/97	86/10609	4.40e-02	1.34e-01	MAPK3, CRK, GRB2	3
R-HSA-6806003	Regulation of TP53 Expression and Degradation	2/97	37/10609	4.48e-02	1.34e-01	AKT2, CDKN2A	2
R-HSA-111448	Activation of NOXA and translocation to mitochondria	1/97	5/10609	4.49e-02	1.34e-01	E2F1	1
R-HSA-111457	Release of apoptotic factors from the mitochondria	1/97	5/10609	4.49e-02	1.34e-01	CYCS	1
R-HSA-189483	Heme degradation	1/97	5/10609	4.49e-02	1.34e-01	HMOX1	1
R-HSA-68911	G2 Phase	1/97	5/10609	4.49e-02	1.34e-01	E2F1	1
R-HSA-8865999	MET activates PTPN11	1/97	5/10609	4.49e-02	1.34e-01	GRB2	1
R-HSA-8941284	RUNX2 regulates chondrocyte maturation	1/97	5/10609	4.49e-02	1.34e-01	GLI2	1
R-HSA-8952158	RUNX3 regulates BCL2L11 (BIM) transcription	1/97	5/10609	4.49e-02	1.34e-01	SMAD3	1
R-HSA-9031525	NR1H2 & NR1H3 regulate gene expression to limit cholesterol uptake	1/97	5/10609	4.49e-02	1.34e-01	RXRA	1
R-HSA-9031528	NR1H2 & NR1H3 regulate gene expression linked to triglyceride lipolysis in adipose	1/97	5/10609	4.49e-02	1.34e-01	RXRA	1
R-HSA-9632974	NR1H2 & NR1H3 regulate gene expression linked to gluconeogenesis	1/97	5/10609	4.49e-02	1.34e-01	RXRA	1
R-HSA-5689896	Ovarian tumor domain proteases	2/97	38/10609	4.70e-02	1.40e-01	TRAF3, PTEN	2
R-HSA-5358351	Signaling by Hedgehog	4/97	149/10609	4.75e-02	1.41e-01	PSMF1, GLI2, SUFU, SMO	4
R-HSA-76009	Platelet Aggregation (Plug Formation)	2/97	39/10609	4.93e-02	1.46e-01	CRK, GRB2	2
R-HSA-5674135	MAP2K and MAPK activation	2/97	40/10609	5.16e-02	1.51e-01	MAPK3, RAF1	2
R-HSA-5675221	Negative regulation of MAPK pathway	2/97	40/10609	5.16e-02	1.51e-01	MAPK3, RAF1	2
R-HSA-168164	Toll Like Receptor 3 (TLR3) Cascade	3/97	93/10609	5.33e-02	1.52e-01	MAPK9, MAPK3, TRAF3	3
R-HSA-194315	Signaling by Rho GTPases	8/97	450/10609	5.34e-02	1.52e-01	H4C8, ARHGEF2, MAPK3, RAC2, PRKCA, DVL3, PRKCB, GRB2	8
R-HSA-3304356	SMAD2/3 Phosphorylation Motif Mutants in Cancer	1/97	6/10609	5.36e-02	1.52e-01	SMAD3	1
R-HSA-3656532	TGFBR1 KD Mutants in Cancer	1/97	6/10609	5.36e-02	1.52e-01	SMAD3	1
R-HSA-5626978	TNFR1-mediated ceramide production	1/97	6/10609	5.36e-02	1.52e-01	TNF	1
R-HSA-8849470	PTK6 Regulates Cell Cycle	1/97	6/10609	5.36e-02	1.52e-01	CCNE1	1
R-HSA-8851907	MET activates PI3K/AKT signaling	1/97	6/10609	5.36e-02	1.52e-01	GRB2	1
R-HSA-8931987	RUNX1 regulates estrogen receptor mediated transcription	1/97	6/10609	5.36e-02	1.52e-01	AXIN1	1
R-HSA-8939256	RUNX1 regulates transcription of genes involved in WNT signaling	1/97	6/10609	5.36e-02	1.52e-01	AXIN1	1
R-HSA-8853659	RET signaling	2/97	41/10609	5.39e-02	1.53e-01	PRKCA, GRB2	2
R-HSA-5655253	Signaling by FGFR2 in disease	2/97	43/10609	5.87e-02	1.65e-01	FGF9, GRB2	2
R-HSA-75893	TNF signaling	2/97	43/10609	5.87e-02	1.65e-01	TRAF1, TNF	2
R-HSA-166166	MyD88-independent TLR4 cascade	3/97	97/10609	5.91e-02	1.65e-01	MAPK9, MAPK3, TRAF3	3
R-HSA-937061	TRIF(TICAM1)-mediated TLR4 signaling	3/97	97/10609	5.91e-02	1.65e-01	MAPK9, MAPK3, TRAF3	3
R-HSA-1236975	Antigen processing-Cross presentation	3/97	99/10609	6.20e-02	1.66e-01	TAPBP, PSMF1, ITGAV	3
R-HSA-112412	SOS-mediated signalling	1/97	7/10609	6.23e-02	1.66e-01	GRB2	1
R-HSA-170984	ARMS-mediated activation	1/97	7/10609	6.23e-02	1.66e-01	CRK	1
R-HSA-3304349	Loss of Function of SMAD2/3 in Cancer	1/97	7/10609	6.23e-02	1.66e-01	SMAD3	1
R-HSA-3656534	Loss of Function of TGFBR1 in Cancer	1/97	7/10609	6.23e-02	1.66e-01	SMAD3	1
R-HSA-426117	Cation-coupled Chloride cotransporters	1/97	7/10609	6.23e-02	1.66e-01	SLC12A7	1
R-HSA-444257	RSK activation	1/97	7/10609	6.23e-02	1.66e-01	MAPK3	1
R-HSA-629587	Highly sodium permeable acetylcholine nicotinic receptors	1/97	7/10609	6.23e-02	1.66e-01	CHRNB2	1
R-HSA-8937144	Aryl hydrocarbon receptor signalling	1/97	7/10609	6.23e-02	1.66e-01	ARNT2	1
R-HSA-8939246	RUNX1 regulates transcription of genes involved in differentiation of myeloid cells	1/97	7/10609	6.23e-02	1.66e-01	PRKCB	1
R-HSA-8941855	RUNX3 regulates CDKN1A transcription	1/97	7/10609	6.23e-02	1.66e-01	SMAD3	1
R-HSA-9027283	Erythropoietin activates STAT5	1/97	7/10609	6.23e-02	1.66e-01	STAT5B	1
R-HSA-9028335	Activated NTRK2 signals through PI3K	1/97	7/10609	6.23e-02	1.66e-01	GRB2	1
R-HSA-500792	GPCR ligand binding	8/97	466/10609	6.29e-02	1.68e-01	WNT11, FZD3, FZD10, WNT1, SMO, WNT4, FZD5, CXCL8	8
R-HSA-611105	Respiratory electron transport	3/97	100/10609	6.35e-02	1.69e-01	NDUFV3, SCO1, CYCS	3
R-HSA-5668541	TNFR2 non-canonical NF-kB pathway	3/97	101/10609	6.51e-02	1.72e-01	PSMF1, TRAF3, TNF	3
R-HSA-6783783	Interleukin-10 signaling	2/97	47/10609	6.86e-02	1.77e-01	CXCL8, TNF	2
R-HSA-6802946	Signaling by moderate kinase activity BRAF mutants	2/97	47/10609	6.86e-02	1.77e-01	MAPK3, RAF1	2
R-HSA-6802949	Signaling by RAS mutants	2/97	47/10609	6.86e-02	1.77e-01	MAPK3, RAF1	2
R-HSA-6802955	Paradoxical activation of RAF signaling by kinase inactive BRAF	2/97	47/10609	6.86e-02	1.77e-01	MAPK3, RAF1	2
R-HSA-9649948	Signaling downstream of RAS mutants	2/97	47/10609	6.86e-02	1.77e-01	MAPK3, RAF1	2
R-HSA-1236973	Cross-presentation of particulate exogenous antigens (phagosomes)	1/97	8/10609	7.09e-02	1.77e-01	ITGAV	1
R-HSA-194313	VEGF ligand-receptor interactions	1/97	8/10609	7.09e-02	1.77e-01	PGF	1
R-HSA-195399	VEGF binds to VEGFR leading to receptor dimerization	1/97	8/10609	7.09e-02	1.77e-01	PGF	1
R-HSA-196836	Vitamin C (ascorbate) metabolism	1/97	8/10609	7.09e-02	1.77e-01	SLC2A1	1
R-HSA-201688	WNT mediated activation of DVL	1/97	8/10609	7.09e-02	1.77e-01	DVL3	1
R-HSA-3304351	Signaling by TGF-beta Receptor Complex in Cancer	1/97	8/10609	7.09e-02	1.77e-01	SMAD3	1
R-HSA-450520	HuR (ELAVL1) binds and stabilizes mRNA	1/97	8/10609	7.09e-02	1.77e-01	PRKCA	1
R-HSA-5340588	RNF mutants show enhanced WNT signaling and proliferation	1/97	8/10609	7.09e-02	1.77e-01	FZD5	1
R-HSA-5638302	Signaling by Overexpressed Wild-Type EGFR in Cancer	1/97	8/10609	7.09e-02	1.77e-01	TGFA	1
R-HSA-5638303	Inhibition of Signaling by Overexpressed EGFR	1/97	8/10609	7.09e-02	1.77e-01	TGFA	1
R-HSA-5688849	Defective CSF2RB causes pulmonary surfactant metabolism dysfunction 5 (SMDP5)	1/97	8/10609	7.09e-02	1.77e-01	CSF2RA	1
R-HSA-5688890	Defective CSF2RA causes pulmonary surfactant metabolism dysfunction 4 (SMDP4)	1/97	8/10609	7.09e-02	1.77e-01	CSF2RA	1
R-HSA-8941332	RUNX2 regulates genes involved in cell migration	1/97	8/10609	7.09e-02	1.77e-01	AKT2	1
R-HSA-9034864	Activated NTRK3 signals through RAS	1/97	8/10609	7.09e-02	1.77e-01	GRB2	1
R-HSA-418597	G alpha (z) signalling events	2/97	48/10609	7.12e-02	1.77e-01	PRKCA, PRKCB	2
R-HSA-8856825	Cargo recognition for clathrin-mediated endocytosis	3/97	105/10609	7.13e-02	1.77e-01	CBL, TGFA, GRB2	3
R-HSA-8978868	Fatty acid metabolism	4/97	177/10609	7.88e-02	1.89e-01	EHHADH, ABCC1, PPARD, RXRA	4
R-HSA-111453	BH3-only proteins associate with and inactivate anti-apoptotic BCL-2 members	1/97	9/10609	7.94e-02	1.89e-01	BCL2L1	1
R-HSA-139915	Activation of PUMA and translocation to mitochondria	1/97	9/10609	7.94e-02	1.89e-01	E2F1	1
R-HSA-198693	AKT phosphorylates targets in the nucleus	1/97	9/10609	7.94e-02	1.89e-01	AKT2	1
R-HSA-212718	EGFR interacts with phospholipase C-gamma	1/97	9/10609	7.94e-02	1.89e-01	TGFA	1
R-HSA-629597	Highly calcium permeable nicotinic acetylcholine receptors	1/97	9/10609	7.94e-02	1.89e-01	CHRNB2	1
R-HSA-8849469	PTK6 Regulates RTKs and Their Effectors AKT1 and DOK1	1/97	9/10609	7.94e-02	1.89e-01	CBL	1
R-HSA-8943723	Regulation of PTEN mRNA translation	1/97	9/10609	7.94e-02	1.89e-01	PTEN	1
R-HSA-8985947	Interleukin-9 signaling	1/97	9/10609	7.94e-02	1.89e-01	STAT5B	1
R-HSA-9010642	ROBO receptors bind AKAP5	1/97	9/10609	7.94e-02	1.89e-01	PRKCA	1
R-HSA-9026519	Activated NTRK2 signals through RAS	1/97	9/10609	7.94e-02	1.89e-01	GRB2	1
R-HSA-9029558	NR1H2 & NR1H3 regulate gene expression linked to lipogenesis	1/97	9/10609	7.94e-02	1.89e-01	RXRA	1
R-HSA-9623433	NR1H2 & NR1H3 regulate gene expression to control bile acid homeostasis	1/97	9/10609	7.94e-02	1.89e-01	RXRA	1
R-HSA-2980766	Nuclear Envelope Breakdown	2/97	52/10609	8.17e-02	1.94e-01	PRKCA, PRKCB	2
R-HSA-983705	Signaling by the B Cell Receptor (BCR)	3/97	112/10609	8.29e-02	1.96e-01	PSMF1, PRKCB, GRB2	3
R-HSA-168643	Nucleotide-binding domain, leucine rich repeat containing receptor (NLR) signaling pathways	2/97	54/10609	8.72e-02	2.04e-01	CASP9, BCL2L1	2
R-HSA-110056	MAPK3 (ERK1) activation	1/97	10/10609	8.78e-02	2.04e-01	MAPK3	1
R-HSA-399997	Acetylcholine regulates insulin secretion	1/97	10/10609	8.78e-02	2.04e-01	PRKCA	1
R-HSA-418889	Caspase activation via Dependence Receptors in the absence of ligand	1/97	10/10609	8.78e-02	2.04e-01	CASP9	1
R-HSA-5687613	Diseases associated with surfactant metabolism	1/97	10/10609	8.78e-02	2.04e-01	CSF2RA	1
R-HSA-9020958	Interleukin-21 signaling	1/97	10/10609	8.78e-02	2.04e-01	STAT5B	1
R-HSA-71406	Pyruvate metabolism and Citric Acid (TCA) cycle	2/97	55/10609	9.00e-02	2.08e-01	PPARD, RXRA	2
R-HSA-8941858	Regulation of RUNX3 expression and activity	2/97	55/10609	9.00e-02	2.08e-01	PSMF1, CDKN2A	2
R-HSA-2151201	Transcriptional activation of mitochondrial biogenesis	2/97	56/10609	9.28e-02	2.14e-01	CYCS, RXRA	2
R-HSA-4641258	Degradation of DVL	2/97	57/10609	9.56e-02	2.14e-01	PSMF1, DVL3	2
R-HSA-69541	Stabilization of p53	2/97	57/10609	9.56e-02	2.14e-01	PSMF1, CDKN2A	2
R-HSA-1059683	Interleukin-6 signaling	1/97	11/10609	9.61e-02	2.14e-01	CBL	1
R-HSA-1839122	Signaling by activated point mutants of FGFR1	1/97	11/10609	9.61e-02	2.14e-01	FGF9	1
R-HSA-2586552	Signaling by Leptin	1/97	11/10609	9.61e-02	2.14e-01	STAT5B	1
R-HSA-390247	Beta-oxidation of very long chain fatty acids	1/97	11/10609	9.61e-02	2.14e-01	EHHADH	1
R-HSA-4755510	SUMOylation of immune response proteins	1/97	11/10609	9.61e-02	2.14e-01	PIAS3	1
R-HSA-5655291	Signaling by FGFR4 in disease	1/97	11/10609	9.61e-02	2.14e-01	GRB2	1
R-HSA-68689	CDC6 association with the ORC:origin complex	1/97	11/10609	9.61e-02	2.14e-01	E2F1	1
R-HSA-8851805	MET activates RAS signaling	1/97	11/10609	9.61e-02	2.14e-01	GRB2	1
R-HSA-9028731	Activated NTRK2 signals through FRS2 and FRS3	1/97	11/10609	9.61e-02	2.14e-01	GRB2	1
R-HSA-9614399	Regulation of localization of FOXO transcription factors	1/97	11/10609	9.61e-02	2.14e-01	AKT2	1
R-HSA-5617472	Activation of anterior HOX genes in hindbrain development during early embryogenesis	3/97	120/10609	9.71e-02	2.15e-01	H4C8, RARA, RXRA	3
R-HSA-5619507	Activation of HOX genes during differentiation	3/97	120/10609	9.71e-02	2.15e-01	H4C8, RARA, RXRA	3
R-HSA-163200	Respiratory electron transport, ATP synthesis by chemiosmotic coupling, and heat production by uncoupling proteins.	3/97	123/10609	1.03e-01	2.22e-01	NDUFV3, SCO1, CYCS	3
R-HSA-112315	Transmission across Chemical Synapses	5/97	272/10609	1.04e-01	2.22e-01	CHRNB2, PPM1F, MAPK3, PRKCA, PRKCB	5
R-HSA-187577	SCF(Skp2)-mediated degradation of p27/p21	2/97	60/10609	1.04e-01	2.22e-01	PSMF1, CCNE1	2
R-HSA-5610780	Degradation of GLI1 by the proteasome	2/97	60/10609	1.04e-01	2.22e-01	PSMF1, SUFU	2
R-HSA-5610785	GLI3 is processed to GLI3R by the proteasome	2/97	60/10609	1.04e-01	2.22e-01	PSMF1, SUFU	2
R-HSA-1296346	Tandem pore domain potassium channels	1/97	12/10609	1.04e-01	2.22e-01	KCNK6	1
R-HSA-170968	Frs2-mediated activation	1/97	12/10609	1.04e-01	2.22e-01	MAPK3	1
R-HSA-190373	FGFR1c ligand binding and activation	1/97	12/10609	1.04e-01	2.22e-01	FGF9	1
R-HSA-210990	PECAM1 interactions	1/97	12/10609	1.04e-01	2.22e-01	ITGAV	1
R-HSA-389359	CD28 dependent Vav1 pathway	1/97	12/10609	1.04e-01	2.22e-01	GRB2	1
R-HSA-430116	GP1b-IX-V activation signalling	1/97	12/10609	1.04e-01	2.22e-01	RAF1	1
R-HSA-622323	Presynaptic nicotinic acetylcholine receptors	1/97	12/10609	1.04e-01	2.22e-01	CHRNB2	1
R-HSA-629594	Highly calcium permeable postsynaptic nicotinic acetylcholine receptors	1/97	12/10609	1.04e-01	2.22e-01	CHRNB2	1
R-HSA-9013973	TICAM1-dependent activation of IRF3/IRF7	1/97	12/10609	1.04e-01	2.22e-01	TRAF3	1
R-HSA-9020558	Interleukin-2 signaling	1/97	12/10609	1.04e-01	2.22e-01	STAT5B	1
R-HSA-9634600	Regulation of glycolysis by fructose 2,6-bisphosphate metabolism	1/97	12/10609	1.04e-01	2.22e-01	PFKFB3	1
R-HSA-73728	RNA Polymerase I Promoter Opening	2/97	61/10609	1.07e-01	2.27e-01	H4C8, MAPK3	2
R-HSA-166016	Toll Like Receptor 4 (TLR4) Cascade	3/97	127/10609	1.10e-01	2.31e-01	MAPK9, MAPK3, TRAF3	3
R-HSA-69306	DNA Replication	3/97	127/10609	1.10e-01	2.31e-01	PSMF1, E2F1, CCNE1	3
R-HSA-113501	Inhibition of replication initiation of damaged DNA by RB1/E2F1	1/97	13/10609	1.13e-01	2.31e-01	E2F1	1
R-HSA-1358803	Downregulation of ERBB2:ERBB3 signaling	1/97	13/10609	1.13e-01	2.31e-01	AKT2	1
R-HSA-1502540	Signaling by Activin	1/97	13/10609	1.13e-01	2.31e-01	SMAD3	1
R-HSA-190375	FGFR2c ligand binding and activation	1/97	13/10609	1.13e-01	2.31e-01	FGF9	1
R-HSA-202670	ERKs are inactivated	1/97	13/10609	1.13e-01	2.31e-01	MAPK3	1
R-HSA-5140745	WNT5A-dependent internalization of FZD2, FZD5 and ROR2	1/97	13/10609	1.13e-01	2.31e-01	FZD5	1
R-HSA-5357786	TNFR1-induced proapoptotic signaling	1/97	13/10609	1.13e-01	2.31e-01	TNF	1
R-HSA-879415	Advanced glycosylation endproduct receptor signaling	1/97	13/10609	1.13e-01	2.31e-01	MAPK3	1
R-HSA-8866910	TFAP2 (AP-2) family regulates transcription of growth factors and their receptors	1/97	13/10609	1.13e-01	2.31e-01	TGFA	1
R-HSA-450294	MAP kinase activation	2/97	63/10609	1.13e-01	2.31e-01	MAPK9, MAPK3	2
R-HSA-9033241	Peroxisomal protein import	2/97	63/10609	1.13e-01	2.31e-01	EHHADH, NOS2	2
R-HSA-114608	Platelet degranulation	3/97	129/10609	1.14e-01	2.33e-01	GTPBP2, TGFB2, TGFB3	3
R-HSA-1442490	Collagen degradation	2/97	64/10609	1.16e-01	2.36e-01	MMP2, COL4A2	2
R-HSA-211897	Cytochrome P450 - arranged by substrate type	2/97	65/10609	1.19e-01	2.37e-01	ARNT2, RXRA	2
R-HSA-9614085	FOXO-mediated transcription	2/97	65/10609	1.19e-01	2.37e-01	AKT2, SMAD3	2
R-HSA-1250347	SHC1 events in ERBB4 signaling	1/97	14/10609	1.21e-01	2.37e-01	GRB2	1
R-HSA-162658	Golgi Cisternae Pericentriolar Stack Reorganization	1/97	14/10609	1.21e-01	2.37e-01	MAPK3	1
R-HSA-190322	FGFR4 ligand binding and activation	1/97	14/10609	1.21e-01	2.37e-01	FGF9	1
R-HSA-4839735	AXIN mutants destabilize the destruction complex, activating WNT signaling	1/97	14/10609	1.21e-01	2.37e-01	AXIN1	1
R-HSA-4839744	truncated APC mutants destabilize the destruction complex	1/97	14/10609	1.21e-01	2.37e-01	AXIN1	1
R-HSA-4839748	AMER1 mutants destabilize the destruction complex	1/97	14/10609	1.21e-01	2.37e-01	AXIN1	1
R-HSA-5467337	APC truncation mutants have impaired AXIN binding	1/97	14/10609	1.21e-01	2.37e-01	AXIN1	1
R-HSA-5467340	AXIN missense mutants destabilize the destruction complex	1/97	14/10609	1.21e-01	2.37e-01	AXIN1	1
R-HSA-5467348	Truncations of AMER1 destabilize the destruction complex	1/97	14/10609	1.21e-01	2.37e-01	AXIN1	1
R-HSA-6804759	Regulation of TP53 Activity through Association with Co-factors	1/97	14/10609	1.21e-01	2.37e-01	AKT2	1
R-HSA-8849471	PTK6 Regulates RHO GTPases, RAS GTPase and MAP kinases	1/97	14/10609	1.21e-01	2.37e-01	CRK	1
R-HSA-9027284	Erythropoietin activates RAS	1/97	14/10609	1.21e-01	2.37e-01	GRB2	1
R-HSA-918233	TRAF3-dependent IRF activation pathway	1/97	14/10609	1.21e-01	2.37e-01	TRAF3	1
R-HSA-1234176	Oxygen-dependent proline hydroxylation of Hypoxia-inducible Factor Alpha	2/97	66/10609	1.22e-01	2.39e-01	LIMD1, PSMF1	2
R-HSA-1169091	Activation of NF-kappaB in B cells	2/97	67/10609	1.25e-01	2.41e-01	PSMF1, PRKCB	2
R-HSA-6802952	Signaling by BRAF and RAF fusions	2/97	67/10609	1.25e-01	2.41e-01	MAPK3, RAF1	2
R-HSA-1483257	Phospholipid metabolism	4/97	210/10609	1.26e-01	2.41e-01	RAB4A, PIK3CG, PIK3R5, PTEN	4
R-HSA-68867	Assembly of the pre-replicative complex	2/97	68/10609	1.28e-01	2.41e-01	PSMF1, E2F1	2
R-HSA-111447	Activation of BAD and translocation to mitochondria	1/97	15/10609	1.29e-01	2.41e-01	AKT2	1
R-HSA-1170546	Prolactin receptor signaling	1/97	15/10609	1.29e-01	2.41e-01	STAT5B	1
R-HSA-181431	Acetylcholine binding and downstream events	1/97	15/10609	1.29e-01	2.41e-01	CHRNB2	1
R-HSA-193807	Synthesis of bile acids and bile salts via 27-hydroxycholesterol	1/97	15/10609	1.29e-01	2.41e-01	RXRA	1
R-HSA-2214320	Anchoring fibril formation	1/97	15/10609	1.29e-01	2.41e-01	COL4A2	1
R-HSA-354194	GRB2:SOS provides linkage to MAPK signaling for Integrins	1/97	15/10609	1.29e-01	2.41e-01	GRB2	1
R-HSA-372708	p130Cas linkage to MAPK signaling for integrins	1/97	15/10609	1.29e-01	2.41e-01	CRK	1
R-HSA-3772470	Negative regulation of TCF-dependent signaling by WNT ligand antagonists	1/97	15/10609	1.29e-01	2.41e-01	WNT4	1
R-HSA-4839743	phosphorylation site mutants of CTNNB1 are not targeted to the proteasome by the destruction complex	1/97	15/10609	1.29e-01	2.41e-01	AXIN1	1
R-HSA-5339716	Misspliced GSK3beta mutants stabilize beta-catenin	1/97	15/10609	1.29e-01	2.41e-01	AXIN1	1
R-HSA-5358747	S33 mutants of beta-catenin aren't phosphorylated	1/97	15/10609	1.29e-01	2.41e-01	AXIN1	1
R-HSA-5358749	S37 mutants of beta-catenin aren't phosphorylated	1/97	15/10609	1.29e-01	2.41e-01	AXIN1	1
R-HSA-5358751	S45 mutants of beta-catenin aren't phosphorylated	1/97	15/10609	1.29e-01	2.41e-01	AXIN1	1
R-HSA-5358752	T41 mutants of beta-catenin aren't phosphorylated	1/97	15/10609	1.29e-01	2.41e-01	AXIN1	1
R-HSA-5654228	Phospholipase C-mediated cascade; FGFR4	1/97	15/10609	1.29e-01	2.41e-01	FGF9	1
R-HSA-622327	Postsynaptic nicotinic acetylcholine receptors	1/97	15/10609	1.29e-01	2.41e-01	CHRNB2	1
R-HSA-202733	Cell surface interactions at the vascular wall	3/97	137/10609	1.30e-01	2.43e-01	ITGA3, ITGAV, GRB2	3
R-HSA-388841	Costimulation by the CD28 family	2/97	69/10609	1.31e-01	2.44e-01	AKT2, GRB2	2
R-HSA-1474228	Degradation of the extracellular matrix	3/97	140/10609	1.36e-01	2.47e-01	CAPNS1, MMP2, COL4A2	3
R-HSA-73887	Death Receptor Signalling	3/97	140/10609	1.36e-01	2.47e-01	ARHGEF2, TRAF1, TNF	3
R-HSA-1362300	Transcription of E2F targets under negative control by p107 (RBL1) and p130 (RBL2) in complex with HDAC1	1/97	16/10609	1.37e-01	2.47e-01	E2F1	1
R-HSA-159418	Recycling of bile acids and salts	1/97	16/10609	1.37e-01	2.47e-01	RXRA	1
R-HSA-189445	Metabolism of porphyrins	1/97	16/10609	1.37e-01	2.47e-01	HMOX1	1
R-HSA-190242	FGFR1 ligand binding and activation	1/97	16/10609	1.37e-01	2.47e-01	FGF9	1
R-HSA-1963640	GRB2 events in ERBB2 signaling	1/97	16/10609	1.37e-01	2.47e-01	GRB2	1
R-HSA-1963642	PI3K events in ERBB2 signaling	1/97	16/10609	1.37e-01	2.47e-01	GRB2	1
R-HSA-2730905	Role of LAT2/NTAL/LAB on calcium mobilization	1/97	16/10609	1.37e-01	2.47e-01	GRB2	1
R-HSA-391160	Signal regulatory protein family interactions	1/97	16/10609	1.37e-01	2.47e-01	GRB2	1
R-HSA-392517	Rap1 signalling	1/97	16/10609	1.37e-01	2.47e-01	RAF1	1
R-HSA-5654219	Phospholipase C-mediated cascade: FGFR1	1/97	16/10609	1.37e-01	2.47e-01	FGF9	1
R-HSA-448424	Interleukin-17 signaling	2/97	71/10609	1.37e-01	2.47e-01	MAPK9, MAPK3	2
R-HSA-6802957	Oncogenic MAPK signaling	2/97	71/10609	1.37e-01	2.47e-01	MAPK3, RAF1	2
